# Supplementary material
Source: PubMed Central journal article supplement (PMC5061030)
Supplement: NIHMS819384-supplement-Supplemental_Data.pdf [file NIHMS819384-supplement-Supplemental_Data.pdf]

Table 1 – Comparison between HCV-infected blood donors and matched controls, before and after awareness of diagnosis, using the Short Form-36 (SF-36) questionnaire

| HRQOL before awareness of diagnosis   |                      |                       |               | HRQOL after awareness of diagnosis |                       |               |
|---------------------------------------|----------------------|-----------------------|---------------|------------------------------------|-----------------------|---------------|
|                                       | Donors with HCV n=35 | Healthy controls n=35 | Wilcoxon test | Donors with HCV n=35               | Healthy controls n=35 | Wilcoxon test |
| <b>Physical Functioning</b>           |                      |                       |               |                                    |                       |               |
| Mean ± SD                             | 89.30 ± 14.70        | 94.70 ± 6.30          | * p = 0.038   | 89.70 ± 15.50                      | 94.70 ± 6.30          | p = 0.235     |
| Median                                | 95.00                | 95.00                 |               | 95.00                              | 95.00                 |               |
| <b>Physical Role Functioning</b>      |                      |                       |               |                                    |                       |               |
| Mean ± SD                             | 90.00 ± 16.70        | 95.00 ± 13.30         | p = 0.138     | 83.60 ± 27.10                      | 95.00 ± 13.30         | * p = 0.040   |
| Median                                | 100.00               | 100.00                |               | 100.00                             | 100.00                |               |
| <b>Bodily Pain</b>                    |                      |                       |               |                                    |                       |               |
| Mean ± SD                             | 76.40 ± 21.10        | 90.90 ± 11.20         | * p = 0.003   | 80.50 ± 22.10                      | 90.90 ± 11.20         | * p = 0.017   |
| Median                                | 74.00                | 100.00                |               | 84.00                              | 100.00                |               |
| <b>General Health Perceptions</b>     |                      |                       |               |                                    |                       |               |
| Mean ± SD                             | 70.60 ± 14.60        | 88.60 ± 11.10         | * p < 0.001   | 69.00 ± 18.10                      | 88.60 ± 11.10         | * p < 0.001   |
| Median                                | 67.00                | 90.00                 |               | 84.00                              | 90.00                 |               |
| <b>Vitality</b>                       |                      |                       |               |                                    |                       |               |
| Mean ± SD                             | 72.70 ± 19.90        | 80.80 ± 11.50         | * p = 0.034   | 70.60 ± 21.00                      | 80.80 ± 11.50         | * p = 0.019   |
| Median                                | 75.00                | 80.00                 |               | 70.00                              | 80.00                 |               |
| <b>Social Role Functioning</b>        |                      |                       |               |                                    |                       |               |
| Mean ± SD                             | 77.30 ± 26.80        | 92.60 ± 13.90         | * p = 0.006   | 76.50 ± 25.60                      | 92.60 ± 13.90         | * p = 0.005   |
| Median                                | 88.00                | 100.00                |               | 75.00                              | 100.00                |               |
| <b>Emotional Role Functioning</b>     |                      |                       |               |                                    |                       |               |
| Mean ± SD                             | 78.10 ± 31.30        | 91.50 ± 18.70         | * p = 0.024   | 77.20 ± 34.10                      | 91.50 ± 18.70         | * p = 0.025   |
| Median                                | 100.00               | 100.00                |               | 100.00                             | 100.00                |               |
| <b>Mental Health</b>                  |                      |                       |               |                                    |                       |               |
| Mean ± SD                             | 74.80 ± 21.40        | 85.70 ± 9.90          | * p = 0.007   | 77.10 ± 19.70                      | 85.70 ± 9.90          | * p = 0.034   |
| Median                                | 80.00                | 88.00                 |               | 84.00                              | 88.00                 |               |
| <b>SF-36 Physical Health Subscale</b> |                      |                       |               |                                    |                       |               |
| Mean ± SD                             | 53.10 ± 6.00         | 57.30 ± 2.90          | * p = 0.002   | 53.20 ± 7.00                       | 57.30 ± 2.90          | * p = 0.008   |
| Median                                | 54.30                | 57.30                 |               | 54.50                              | 57.30                 |               |
| <b>SF-36 Mental Health Subscale</b>   |                      |                       |               |                                    |                       |               |
| Mean ± SD                             | 50.30 ± 10.70        | 55.00 ± 5.60          | * p = 0.028   | 50.10 ± 11.40                      | 55.00 ± 5.60          | p = 0.085     |
| Median                                | 53.40                | 55.90                 |               | 52.80                              | 55.90                 |               |
